# Supplementary material
Source: PubMed Central journal article supplement (PMC2095625)
Supplement: jnnpsyc_jnnp.2007.117150_1.pdf [file jnnpsyc_jnnp.2007.117150_1.pdf]

## Web only appendix

### Models on which the approximation formulae are based

| Model                          | Explanatory variable              | Coefficient (B)          | 95% Confidence interval | R <sup>2</sup> |
|--------------------------------|-----------------------------------|--------------------------|-------------------------|----------------|
| 1 (males)                      | Constant                          | -137.432                 | [-141.497; -133.366]    | 0.846          |
|                                | Body height [cm]                  | 0.60035                  | [0.57856; 0.62213]      |                |
|                                | Waist circumference [cm]          | 0.785                    | [0.765; 0.805]          |                |
|                                | Hip circumference [cm]            | 0.392                    | [0.367; 0.418]          |                |
| 1 (females)                    | Constant                          | -110.924                 | [-115.565; -106.283]    | 0.815          |
|                                | Body height [cm]                  | 0.4053                   | [0.37851; 0.43208]      |                |
|                                | Waist circumference [cm]          | 0.325                    | [0.309; 0.342]          |                |
|                                | Hip circumference [cm]            | 0.836                    | [0.810; 0.863]          |                |
| 2 (males)                      | Constant                          | -120.527                 | [-125.037; -116.016]    | 0.855          |
|                                | Age [years]                       | -0.108                   | [-0.122; -0.094]        |                |
|                                | Body height [cm]                  | 0.51708                  | [0.49336; 0.54080]      |                |
|                                | Waist circumference [cm]          | 0.820                    | [0.800; 0.840]          |                |
|                                | Hip circumference [cm]            | 0.391                    | [0.366; 0.416]          |                |
| 2 (females)                    | Constant                          | -114.187                 | [-119.363; -109.010]    | 0.815          |
|                                | Age [years]                       | 0.022                    | [0.006; 0.037]          |                |
|                                | Body height [cm]                  | 0.42105                  | [0.39208; 0.45003]      |                |
|                                | Waist circumference [cm]          | 0.319                    | [0.302; 0.336]          |                |
|                                | Hip circumference [cm]            | 0.838                    | [0.811; 0.864]          |                |
| 3 (males)                      | Constant                          | -627.848                 | [-794.172; -461.524]    | 0.867          |
|                                | Age <sup>3</sup>                  | -1.626×10 <sup>-5</sup>  | *                       |                |
|                                | Log(age)                          | 1.588                    | [0.143; 3.033]          |                |
|                                | Body height <sup>3</sup>          | 2.791×10 <sup>-6</sup>   | *                       |                |
|                                | Body height <sup>-1</sup>         | -7761.255                | [-13243.587; -2278.922] |                |
|                                | e <sup>body height</sup>          | 1.944×10 <sup>-87</sup>  | *                       |                |
|                                | Waist circumference               | 1.614                    | [0.911; 2.318]          |                |
|                                | Waist circumference <sup>3</sup>  | -4.05×10 <sup>-6</sup>   | *                       |                |
|                                | Waist circumference <sup>-1</sup> | 6538.191                 | [3113.009; 9963.372]    |                |
|                                | e <sup>waist circumference</sup>  | -1.435×10 <sup>-77</sup> | *                       |                |
|                                | Hip circumference                 | 3.843                    | [2.701; 4.985]          |                |
|                                | Hip circumference <sup>3</sup>    | 5.19×10 <sup>-5</sup>    | *                       |                |
|                                | Hip circumference <sup>-1</sup>   | 18338.951                | [12233.477; 24444.426]  |                |
| e <sup>hip circumference</sup> | -7.261×10 <sup>-71</sup>          | *                        |                         |                |
| 3 (females)                    | Constant                          | -468.358                 | [-654.560; -282.156]    | 0.833          |
|                                | Age <sup>2</sup>                  | 0.002                    | [0.001; 0.003]          |                |
|                                | Age <sup>3</sup>                  | -2.475×10 <sup>-5</sup>  | *                       |                |
|                                | Body height <sup>3</sup>          | 4.025×10 <sup>-6</sup>   | *                       |                |
|                                | Body height <sup>-1</sup>         | -2835.831                | [-8710.043; 3038.381]   |                |
|                                | e <sup>body height</sup>          | -2.465×10 <sup>-85</sup> | *                       |                |
|                                | Waist circumference               | -1.030                   | [-1.475; -0.585]        |                |
|                                | Waist circumference <sup>3</sup>  | 3.398×10 <sup>-5</sup>   | *                       |                |
|                                | Waist circumference <sup>-1</sup> | -3673.350                | [-5513.718; -1832.982]  |                |
|                                | e <sup>waist circumference</sup>  | -1.642×10 <sup>-64</sup> | *                       |                |
|                                | Hip circumference                 | 4.684                    | [3.371; 5.996]          |                |
|                                | Hip circumference <sup>3</sup>    | -5.313×10 <sup>-5</sup>  | *                       |                |
|                                | Hip circumference <sup>-1</sup>   | 22591.386                | [15410.216; 29772.556]  |                |
| e <sup>hip circumference</sup> | 3.019×10 <sup>-63</sup>           | *                        |                         |                |

\* The confidence interval could not be calculated by SPSS
